# Supplementary material for: Identification of potential pathways involved in the induction of cell cycle arrest and apoptosis by a new 4-arylidene curcumin analogue T63 in lung cancer cells: a comparative proteomic analysis
Source: Royal Society of Chemistry journal article supplement (doi:10.1039/c3mb70553f), 2014-03-03
Supplement: c3mb70553f2.pdf [file c3mb70553f2.pdf]

**Table S1. Identification of differentially expressed proteins in A549 cells treated with T63 and curcumin by MALDI-TOF-MS/MS.**

| Spot no. <sup>a</sup>                     | Protein name                                       | Gene symbol | Accession no. <sup>b</sup> | MW (kDa) <sup>c</sup> | pI <sup>d</sup> | Matched Peptides | Protein Score <sup>e</sup> | Coverage (%) <sup>f</sup> | Fold change (Treated/Control) <sup>g</sup> |           |
|-------------------------------------------|----------------------------------------------------|-------------|----------------------------|-----------------------|-----------------|------------------|----------------------------|---------------------------|--------------------------------------------|-----------|
|                                           |                                                    |             |                            |                       |                 |                  |                            |                           | T63                                        | curcumin  |
| <b><i>Energy Metabolism</i></b>           |                                                    |             |                            |                       |                 |                  |                            |                           |                                            |           |
| 18                                        | glucose-6-phosphate dehydrogenase                  | G6PD        | gi 26224790                | 55188                 | 6.91            | 21               | 142                        | 44                        | 0.42±0.08                                  | 1.02±0.08 |
| 25                                        | glutamate dehydrogenase                            | GLUD1       | gi 183056                  | 28791                 | 7.89            | 17               | 400                        | 62                        | 7.09±0.12                                  | 2.18±0.15 |
| 26                                        | aldose reductase                                   | AKR1B1      | gi 4502049                 | 36230                 | 6.51            | 18               | 515                        | 58                        | 1.92±0.08                                  | 0.95±0.07 |
| 43                                        | glutamate dehydrogenase 1, mitochondrial precursor | GLUD1       | gi 4885281                 | 61701                 | 7.66            | 30               | 713                        | 49                        | 1.59±0.05                                  | 1.77±0.05 |
| 65                                        | enolase 1 variant                                  | ENO1        | gi 62896593                | 47453                 | 7.01            | 25               | 564                        | 58                        | 2.21±0.11                                  | 1.32±0.16 |
| <b><i>Cell structure and motility</i></b> |                                                    |             |                            |                       |                 |                  |                            |                           |                                            |           |
| 1                                         | Vimentin                                           | VIM         | gi 62414289                | 53676                 | 5.06            | 38               | 866                        | 74                        | 0.49±0.13                                  | 0.95±0.18 |
| 2                                         | vimentin                                           | VIM         | gi 62414289                | 53676                 | 5.06            | 45               | 873                        | 77                        | 0.53±0.09                                  | 0.89±0.12 |
| 3                                         | laminin-binding protein                            | LBP         | gi 34234                   | 31888                 | 4.84            | 14               | 643                        | 48                        | 0.58±0.06                                  | 0.52±0.08 |
| 4                                         | tropomyosin 2 (beta)                               | TPM2        | gi 55859705                | 37010                 | 4.73            | 12               | 90                         | 27                        | 0.62±0.11                                  | 0.55±0.06 |
| 6                                         | tropomyosin 1 (alpha)                              | TPM1        | gi 11959803                | 32552                 | 4.69            | 9                | 112                        | 34                        | 0.47±0.08                                  | 0.57±0.12 |
| 9                                         | cytokeratin 8                                      | KRT8        | gi 181573                  | 53529                 | 5.52            | 40               | 464                        | 61                        | 2.50±0.15                                  | 2.33±0.08 |
| 10                                        | actin-related protein 3                            | ACTR3       | gi 5031573                 | 47797                 | 5.61            | 30               | 660                        | 61                        | 0.57±0.10                                  | 0.46±0.09 |
| 15                                        | cytokeratin 18 (424 AA)                            | KRT18       | gi 30311                   | 47305                 | 5.27            | 12               | 202                        | 16                        | 2.26±0.12                                  | 1.17±0.16 |
| 30                                        | F-actin-capping protein subunit beta isoform 1     | CAPZB       | gi 4826659                 | 30952                 | 5.69            | 19               | 554                        | 51                        | 0.61±0.08                                  | 0.58±0.13 |
| 40                                        | cytokeratin 18 (232 AA)                            | KRT18       | gi 34035                   | 26434                 | 4.92            | 10               | 147                        | 24                        | > 50                                       | 1.01±0.05 |
| 52                                        | cytoplasmic dynein 1 intermediate chain 2          | DYNC1I2     | gi 24307879                | 71811                 | 5.08            | 18               | 303                        | 35                        | 0.65±0.15                                  | 0.69±0.12 |
| 63                                        | mitochondrial inner membrane protein isoform 3     | IMMT        | gi 15435496                | 82973                 | 6.15            | 26               | 483                        | 36                        | 1.73±0.06                                  | 1.56±0.10 |

**Table S1. Continue 1**

| Spot no. <sup>a</sup>             | Protein name                                                    | Gene symbol | Accession no. <sup>b</sup> | MW (kDa) <sup>c</sup> | pI <sup>d</sup> | Matched Peptides | Protein Score <sup>e</sup> | Coverage (%) <sup>f</sup> | Fold change (Treated/Control) <sup>g</sup> |           |
|-----------------------------------|-----------------------------------------------------------------|-------------|----------------------------|-----------------------|-----------------|------------------|----------------------------|---------------------------|--------------------------------------------|-----------|
|                                   |                                                                 |             |                            |                       |                 |                  |                            |                           | T63                                        | curcumin  |
| <b><i>Protein degradation</i></b> |                                                                 |             |                            |                       |                 |                  |                            |                           |                                            |           |
| 16                                | ubiquitin B, isoform CRA_d                                      | UBB         | gi 119624910               | 13123                 | 6.84            | 8                | 304                        | 47                        | > 50                                       | > 50      |
| 28                                | ubiquitin carboxyl-terminal hydrolase isozyme L1                | UCHL1       | gi 21361091                | 25151                 | 5.33            | 14               | 529                        | 72                        | 0.49±0.07                                  | 0.76±0.06 |
| 29                                | proteasome activator complex subunit 2                          | PSME2       | gi 30410792                | 27555                 | 5.54            | 12               | 239                        | 42                        | 0.32±0.08                                  | 0.45±0.11 |
| 33                                | proteasome activator complex subunit 1 isoform 2                | PSME1       | gi 30581141                | 28755                 | 6.28            | 14               | 444                        | 39                        | 0.37±0.14                                  | 0.33±0.10 |
| 34                                | 26S protease regulatory subunit 7 isoform 1                     | PSMC2       | gi 4506209                 | 49002                 | 5.71            | 30               | 839                        | 55                        | 0.55±0.05                                  | 0.45±0.09 |
| 47                                | proteasome (prosome, macropain) 26S subunit, ATPase, 5, isoform | PSMC5       | gi 119614675               | 43266                 | 8.50            | 20               | 366                        | 43                        | 0.63±0.08                                  | 0.52±0.12 |
| <b><i>Protein folding</i></b>     |                                                                 |             |                            |                       |                 |                  |                            |                           |                                            |           |
| 49                                | heat shock protein HSP 90-beta                                  | HSP90A B1   | gi 20149594                | 83554                 | 4.97            | 27               | 607                        | 43                        | 0.32±0.25                                  | 0.41±0.14 |
| 50                                | heat shock protein HSP 90-alpha isoform 2                       | HSP90A A1   | gi 154146191               | 85006                 | 4.94            | 24               | 618                        | 35                        | 0.25±0.18                                  | 0.36±0.11 |
| 51                                | heat shock 70kDa protein 8 isoform 2 variant                    | HSPA8       | gi 62896815                | 53580                 | 5.62            | 16               | 447                        | 39                        | 0.19±0.22                                  | 0.38±0.08 |
| 54                                | HSP70-1                                                         | HSPA1 A     | gi 4529893                 | 70280                 | 5.48            | 37               | 846                        | 60                        | 3.05±0.15                                  | 1.95±0.18 |
| 55                                | heat shock protein gp96 precursor                               | HSP90B 1    | gi 15010550                | 90309                 | 4.73            | 33               | 571                        | 40                        | 0.11±0.13                                  | 0.32±0.09 |
| 56                                | Heat shock protein HSP 90-alpha 2                               | HSP90A A1   | gi 61656603                | 98622                 | 5.09            | 36               | 520                        | 38                        | 0.48±0.16                                  | 0.41±0.22 |
| 58                                | endoplasmic reticulum resident protein 44 precursor             | ERP44       | gi 52487191                | 47341                 | 5.09            | 19               | 576                        | 48                        | 2.94±0.08                                  | 1.06±0.12 |

**Table S1. Continue 2**

| Spot no. <sup>a</sup>                             | Protein name                                                | Gene symbol | Accession no. <sup>b</sup> | MW (kDa) <sup>c</sup> | pI <sup>d</sup> | Matched Peptides | Protein Score <sup>e</sup> | Coverage (%) <sup>f</sup> | Fold change (Treated/Control) <sup>g</sup> |           |
|---------------------------------------------------|-------------------------------------------------------------|-------------|----------------------------|-----------------------|-----------------|------------------|----------------------------|---------------------------|--------------------------------------------|-----------|
|                                                   |                                                             |             |                            |                       |                 |                  |                            |                           | T63                                        | curcumin  |
| <b><i>Signal transduction</i></b>                 |                                                             |             |                            |                       |                 |                  |                            |                           |                                            |           |
| 17                                                | Ras-GTPase-activating protein SH3-domain-binding protein    | G3BP1       | gi 119582065               | 52962                 | 5.48            | 5                | 73                         | 24                        | 0.51±0.06                                  | 0.63±0.15 |
| 37                                                | 14-3-3 protein zeta/delta                                   | YWHAZ       | gi 4507953                 | 27899                 | 4.73            | 23               | 420                        | 58                        | 0.52±0.15                                  | 0.56±0.12 |
| 38                                                | SFN protein                                                 | SFN         | gi 16306737                | 24378                 | 4.77            | 21               | 402                        | 61                        | 0.58±0.16                                  | 0.83±0.21 |
| <b><i>RNA processing</i></b>                      |                                                             |             |                            |                       |                 |                  |                            |                           |                                            |           |
| 12                                                | TAR DNA-binding protein 43                                  | TARDBP      | gi 6678271                 | 45053                 | 5.85            | 12               | 313                        | 21                        | 0.58±0.12                                  | 0.56±0.18 |
| 19                                                | heterogeneous nuclear ribonucleoprotein K isoform a variant | HNRNP K     | gi 62088704                | 49002                 | 5.48            | 19               | 440                        | 44                        | 0.54±0.12                                  | 0.85±0.07 |
| 35                                                | heterogeneous nuclear ribonucleoproteins C1/C2 isoform b    | HNRNP C     | gi 117190174               | 32375                 | 4.94            | 15               | 247                        | 35                        | 0.61±0.08                                  | 1.06±0.25 |
| 44                                                | heterogeneous nuclear ribonucleoprotein H                   | HNRNP H     | gi 5031753                 | 49484                 | 5.89            | 28               | 709                        | 63                        | 0.70±0.10                                  | 1.66±0.10 |
| <b><i>Protein Metabolism and Modification</i></b> |                                                             |             |                            |                       |                 |                  |                            |                           |                                            |           |
| 14                                                | protein phosphatase type 2A catalytic subunit               | PPP2CB      | gi 17149125                | 36179                 | 5.22            | 8                | 92                         | 29                        | 1.95±0.08                                  | 0.41±0.20 |
| 31                                                | Ribosomal protein, large, P0                                | RPLP0       | gi 12654583                | 34424                 | 5.42            | 24               | 1050                       | 59                        | 0.59±0.06                                  | 0.57±0.09 |
| 32                                                | eukaryotic translation initiation factor 3 subunit I        | EIF3D       | gi 4503513                 | 36878                 | 5.38            | 18               | 691                        | 65                        | 0.51±0.14                                  | 0.46±0.13 |
| 36                                                | protein S100-A6                                             | S100A6      | gi 7657532                 | 10230                 | 5.33            | 4                | 126                        | 30                        | > 50                                       | > 50      |
| 39                                                | elongation factor 1-beta                                    | EEF1B2      | gi 4503477                 | 24919                 | 4.50            | 13               | 709                        | 50                        | 0.82±0.09                                  | 0.61±0.07 |
| 66                                                | elongation factor Tu                                        | TUFM        | gi 704416                  | 49851                 | 7.70            | 28               | 686                        | 62                        | 1.69±0.10                                  | 1.21±0.16 |
| 68                                                | eukaryotic translation initiation factor 5A-1 isoform B     | EIF5A       | gi 4503545                 | 17049                 | 5.08            | 8                | 311                        | 42                        | 1.55±0.05                                  | 1.08±0.12 |

**Table S1. Continue 3**

| Spot no. <sup>a</sup>                                | Protein name                                                  | Gene symbol | Accession no. <sup>b</sup> | MW (kDa) <sup>c</sup> | pI <sup>d</sup> | Matched Peptides | Protein Score <sup>e</sup> | Coverage (%) <sup>f</sup> | Fold change (Treated/Control) <sup>g</sup> |           |
|------------------------------------------------------|---------------------------------------------------------------|-------------|----------------------------|-----------------------|-----------------|------------------|----------------------------|---------------------------|--------------------------------------------|-----------|
|                                                      |                                                               |             |                            |                       |                 |                  |                            |                           | T63                                        | curcumin  |
| <i>oxidative stress</i>                              |                                                               |             |                            |                       |                 |                  |                            |                           |                                            |           |
| 13                                                   | cytochrome b-c1 complex subunit 1                             | UQCRC1      | gi 46593007                | 53297                 | 5.94            | 27               | 687                        | 62                        | 8.47±0.16                                  | 1.41±0.25 |
| 22                                                   | acyl-Coenzyme A dehydrogenase, very long chain, isoform CRA_a | ACADV L     | gi 119610653               | 73288                 | 9.16            | 12               | 142                        | 21                        | 2.99±0.04                                  | 1.06±0.13 |
| 27                                                   | glutathione S-transferase-P1c                                 | GSTP1       | gi 726098                  | 23583                 | 5.43            | 14               | 561                        | 70                        | 0.66±0.11                                  | 0.62±0.16 |
| 46                                                   | NADH-ubiquinone oxidoreductase 75 kDa subunit                 | NDUFS1      | gi 316983156               | 74393                 | 5.61            | 33               | 726                        | 49                        | 1.86±0.05                                  | 1.53±0.10 |
| 48                                                   | cytochrome c oxidase subunit 6B1                              | COX6B1      | gi 4502985                 | 10414                 | 6.54            | 5                | 79                         | 60                        | 1.43±0.15                                  | 1.51±0.19 |
| 60                                                   | inosine-5'-monophosphate dehydrogenase 2                      | IMPDH2      | gi 66933016                | 56226                 | 6.44            | 23               | 416                        | 46                        | 0.53±0.11                                  | 0.41±0.08 |
| <i>Cell proliferation, Cell Cycle, and apoptosis</i> |                                                               |             |                            |                       |                 |                  |                            |                           |                                            |           |
| 7                                                    | PCNA                                                          | PCNA        | gi 49456555                | 29029                 | 4.57            | 22               | 557                        | 73                        | 0.47±0.13                                  | 0.55±0.12 |
| 20                                                   | X-ray repair cross-complementing protein 5                    | XRCC5       | gi 10863945                | 83222                 | 5.55            | 28               | 308                        | 35                        | 0.46±0.04                                  | 0.93±0.11 |
| 24                                                   | annexin A1                                                    | ANXA1       | gi 4502101                 | 38918                 | 6.57            | 21               | 974                        | 62                        | 2.52±0.23                                  | 1.95±0.05 |
| 41                                                   | galectin-1                                                    | LGALS1      | gi 4504981                 | 15048                 | 5.34            | 10               | 311                        | 76                        | 0.55±0.15                                  | 0.61±0.09 |
| 42                                                   | omega-amidase NIT2                                            | Nit2        | gi 9910460                 | 30988                 |                 | 13               | 202                        |                           | 12.30±0.05                                 | 0.98±0.18 |
| 45                                                   | histone-binding protein RBBP4 isoform c                       | RBBP4       | gi 207029439               | 43740                 | 4.80            | 13               | 294                        | 43                        | 0.63±0.08                                  | 0.53±0.16 |
| 57                                                   | Chain B, Crystal Structure Of The Ku Heterodimer              | XRCC6       | gi 15825665                | 64577                 | 5.98            | 27               | 239                        | 31                        | 0.58±0.12                                  | 0.56±0.21 |
| 64                                                   | programmed cell death 6-interacting protein isoform 1         | PDCD6IP     | gi 22027538                | 96590                 | 6.13            | 21               | 274                        | 26                        | 2.15±0.16                                  | 1.96±0.11 |
| 59                                                   | voltage-dependent anion channel 2                             | VDAC2       | gi 55664661                | 30842                 | 8.0             | 12               | 812                        | 57                        | 3.01±0.09                                  | 1.05±0.13 |
| 61                                                   | Annexin A2                                                    | ANXA2       | gi 18645167                | 38780                 | 7.57            | 26               | 696                        | 67                        | 3.41±0.05                                  | 0.88±0.10 |

**Table S1. Continue 4**

| Spot no. <sup>a</sup> | Protein name                        | Gene symbol | Accession no. <sup>b</sup> | MW (kDa) <sup>c</sup> | pI <sup>d</sup> | Matched Peptides | Protein Score <sup>e</sup> | Coverage (%) <sup>f</sup> | Fold change (Treated/Control) <sup>g</sup> |           |
|-----------------------|-------------------------------------|-------------|----------------------------|-----------------------|-----------------|------------------|----------------------------|---------------------------|--------------------------------------------|-----------|
|                       |                                     |             |                            |                       |                 |                  |                            |                           | T63                                        | curcumin  |
| <i>Others</i>         |                                     |             |                            |                       |                 |                  |                            |                           |                                            |           |
| 5                     | spermine synthase                   | SMS         | gi 791051                  | 41852                 | 4.87            | 21               | 635                        | 66                        | 0.51±0.15                                  | 0.43±0.12 |
| 11                    | unnamed protein product             |             | gi 194376310               | 38950                 | 5.76            | 5                | 148                        | 27                        | 2.00±0.09                                  | 0.59±0.15 |
| 23                    | kinesin light chain 4 isoform b     | KLC4        | gi 41871960                | 70965                 | 5.95            | 9                | 139                        | 16                        | 3.43±0.12                                  | 1.07±0.05 |
| 53                    | Importin 5                          | IPO5        | gi 28277071                | 126989                | 4.82            | 11               | 177                        | 11                        | 0.15±0.28                                  | 0.20±0.09 |
| 62                    | POTE ankyrin domain family member F | POTEF       | gi 153791352               | 123020                | 5.83            | 12               | 111                        | 7                         | > 50                                       | 1.03±0.28 |
| 67                    | importin subunit beta-1             | KPNB1       | gi 19923142                | 98420                 | 4.68            | 34               | 442                        | 41                        | 0.09±0.05                                  | 0.11±0.06 |

<sup>a</sup> Spot numbers correspond with 2-DE gel as shown in Fig. 3. <sup>b</sup> Accession number in NCBI database. <sup>c</sup> MW (kDa): molecular mass of predicted protein. <sup>d</sup> pI: pI of predicted protein. <sup>e</sup> Protein score: In MASCOT, the score for an MS/MS match is based on the absolute probability ( $P$ ), and the observed match between the experimental data and database sequence is a random event. The reported score is  $-10 \log(P)$ . So during a search, if  $1.5 \times 10^5$  peptides fell with the mass tolerance window the precursor mass, and the significance threshold was chosen to be 0.05, this would translate into a score threshold of 65. <sup>f</sup> Percentage of predicted protein sequence covered by matched sequence. <sup>g</sup> Fold change is expressed as a ratio of the Vol% between of treated/control cells, and each value represents the mean value  $\pm$ SD of three independent experiments.
